# Supplementary material for: Realization of switching between TADF and HLCT emissions through modulation of the intramolecular charge transfer character
Source: Royal Society of Chemistry journal article supplement (doi:10.1039/d2tc02896d), 2022-01-01

## Supporting Information

### **Realization of switching between TADF and HLCT emissions through modulation of the intramolecular charge transfer character**

Jiaqi Li, Mingfan Zhang, Tingyu Li, Dongxue Guo, Tian Tian, and Houyu Zhang\*

*State key laboratory of supramolecular structure and materials,*

*Institute of theoretical chemistry, College of Chemistry, Jilin university,*

*Changchun 130012, P.R. China*

\*Email: [hoyuzhang@jlu.edu.cn](mailto:hoyuzhang@jlu.edu.cn)

# Contents

**Table S1.** Calculated HOMO energies of molecule **TPA-BZP** with different DFT functionals.

**Table S2.** Calculated absorption and emission wavelengths of **TPA-BZP** with different functionals.

**Table S3.** Calculated  $\Delta E_{T_2-T_1}$  of the TPA-based D-A type molecules and different acceptor units.

**Table S4.** NTO distributions and main transition excitations of acceptor fragments.

**Table S5.** Calculated HOMO-LUMO overlap integral and charge transfer amount in  $S_0$  state.

**Table S6.** Calculated HOMO and LUMO levels of the donor and acceptor segments.

**Table S7.** Calculated absorption wavelengths and energies, oscillator strengths, and dominant orbital excitations from TD-DFT calculation.

**Table S8.** Calculated the related orbital distributions and vertical excitation energies of LE states.

**Table S9.** Calculated vertical excitation energies and gaps of the investigated molecules.

**Table S10.** Calculated adiabatic excitation energies and gaps of the investigated molecules.

**Table S11.** Calculated  $\Delta E_{T_2-T_1}$  and NAC constants between  $T_1$  and  $T_2$  states by ORCA package.

**Table S12.** Calculated parameters for the state hybridization of LE and CT states.

**Table S13.** Calculated dihedral angles for the investigated molecules in ground and excited states.

**Table S14.** Calculated parameters for the state hybridization of LE and CT states for the investigated D-A-D type molecules.

**Table S15.** Calculated vertical excitation energies of singlet and triplet states, energy gaps, SOC and NAC constants,  $k_{RISC}$ ,  $k_p$  and  $k_f$  of the investigated molecules.

**Figure S1.** The TDM maps, the overlaps and distributions of electron-hole wavefunctions of the **BF**-based molecules.

**Figure S2.** NTO analysis for excited states and related energy diagrams of the state hybridization between LE and CT states for both singlet and triplet subspaces.

**Figure S3.** Calculated emission energies and oscillator strengths in  $S_1$  states of the **POZ**-based molecules as function of the twisted angles.

**Figure S4.** Chemical structures of the investigated D-A-D type molecules.

**Figure S5.** NTO analysis for the related excited states and energy diagrams of the state hybridization between LE and CT states for D-A-D type HLCT molecules.

**Figure S6.** NTO analysis for the related excited states and energy diagrams of the state hybridization between LE and CT states for D-A-D type TADF molecules.

**Table S1.** Calculated HOMO energies of molecule **TPA-BZP** with different DFT functionals with a fixed percentage of nonlocal Hartree-Fock exchange ( $\text{HF}_{\text{exc}}$ ).

|                         | <b>B3LYP</b> | <b>PBE0</b>  | <b>BMK</b> | <b>CAM-B3LYP</b>               | <b>Exptl.<sup>a</sup></b> |
|-------------------------|--------------|--------------|------------|--------------------------------|---------------------------|
| <b>HF<sub>exc</sub></b> | <b>20%</b>   | <b>25%</b>   | <b>42%</b> | <b>19% at SR and 65% at LR</b> |                           |
| <b>HOMO (eV)</b>        | -4.95        | <b>-5.18</b> | -5.61      | -6.19                          | <b>-5.22</b>              |

<sup>a</sup>Exptl: from ref. 35.

**Table S2.** Calculated absorption wavelength ( $\lambda_{\text{abs}}$ ) and emission wavelength ( $\lambda_{\text{em}}$ ) of molecule **TPA-BZP** with different DFT functionals with a fixed percentage of nonlocal Hartree-Fock exchange ( $\text{HF}_{\text{exc}}$ ).

|                                               | <b>B3LYP</b> | <b>PBE0</b> | <b>BMK</b> | <b>CAM-B3LYP</b>               | <b>Exptl.<sup>a</sup></b> |
|-----------------------------------------------|--------------|-------------|------------|--------------------------------|---------------------------|
| <b>HF<sub>exc</sub></b>                       | <b>20%</b>   | <b>25%</b>  | <b>42%</b> | <b>19% at SR and 65% at LR</b> |                           |
| <b><math>\lambda_{\text{abs}}</math> (nm)</b> | 544          | 508         | <b>433</b> | 398                            | <b>436</b>                |
| <b><math>\lambda_{\text{em}}</math> (nm)</b>  | 687          | 611         | <b>527</b> | 509                            | <b>523</b>                |

<sup>a</sup>Exptl: from ref. 35.

**Table S3.** Calculated  $\Delta E_{T_2-T_1}$  of the TPA-based D-A type molecules and different acceptor units.

| <b>Mol.</b>     | <b><math>\Delta E_{T_2-T_1}</math> (D-A)</b> | <b><math>\Delta E_{T_2-T_1}</math> (A)</b> |
|-----------------|----------------------------------------------|--------------------------------------------|
| <b>TPA-AN</b>   | 1.38 (1.31) <sup>a</sup>                     | 1.58 (1.62) <sup>a</sup>                   |
| <b>TPA-AC</b>   | 1.15 (1.12) <sup>b</sup>                     | 1.44                                       |
| <b>TPA-NZP</b>  | 1.50 (1.60) <sup>c</sup>                     | 1.79 (1.51) <sup>c</sup>                   |
| <b>TPA-DPPZ</b> | 0.47 (0.90) <sup>d</sup>                     | 0.40                                       |
| <b>TPA-BZP</b>  | 1.00 (0.97) <sup>e</sup>                     | 1.00                                       |

<sup>a, b, c, d, e</sup>: Data in parentheses are respectively from ref. 46, 48, 50, 37, 35.

**Table S4.** NTO distributions and main transition excitations of T<sub>1</sub> and T<sub>2</sub> states for various acceptor fragments, estimated by TD-DFT at the BMK/6-31G (d, p) level.

|      | State          | Excitation                                            | NTOs                                                                                |                                                                                       |
|------|----------------|-------------------------------------------------------|-------------------------------------------------------------------------------------|---------------------------------------------------------------------------------------|
|      |                |                                                       | Hole                                                                                | Electron                                                                              |
| AN   | T <sub>1</sub> | H → L (95.8%)                                         | 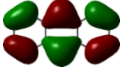   |    |
|      | T <sub>2</sub> | H-2 → L (51.8%)<br>H → L+2 (40.8%)                    |    |    |
| AC   | T <sub>1</sub> | H → L (94.7%)                                         |    |    |
|      | T <sub>2</sub> | H-3 → L (61.9%)<br>H → L+2 (31.8%)                    |    |    |
| NZ   | T <sub>1</sub> | H → L (99.7%)                                         |    |    |
|      | T <sub>2</sub> | H-1 → L (96.5%)                                       |   |    |
| DPPZ | T <sub>1</sub> | H → L (56.1%)<br>H-2 → L (25.2%)                      |    |    |
|      | T <sub>2</sub> | H-3 → L (89.8%)                                       |  |  |
|      | T <sub>3</sub> | H-1 → L (90.4%)                                       |  |  |
|      | T <sub>4</sub> | H-2 → L (31.5%)<br>H → L+2 (25.3%)<br>H-4 → L (11.9%) |  |  |
| BZ   | T <sub>1</sub> | H → L (94.9%)                                         |  |  |
|      | T <sub>2</sub> | H-1 → L (98.5%)                                       |  |  |
| BZP  | T <sub>1</sub> | H → L (81.9%)                                         |  |  |
|      | T <sub>2</sub> | H-2 → L (92.5%)                                       |  |  |
| BF   | T <sub>1</sub> | H → L (83.0%)<br>H → L+1 (5.7%)                       |  |  |
|      | T <sub>2</sub> | H-1 → L (77.9%)<br>H-1 → L+2 (7.2%)                   |  |  |

**Table S5.** Calculated HOMO-LUMO overlap integral ( $\beta$ ) and charge transfer amount ( $q$ ) of the investigated molecules in  $S_0$  state.

| Mol.         | TPA-BZP | TPA-BF | POZ-BZP | POZ-BF |
|--------------|---------|--------|---------|--------|
| $\beta(S_0)$ | 0.4167  | 0.3299 | 0.1234  | 0.1345 |
| $q$          | 0.8125  | 0.8293 | 0.9162  | 0.9306 |

**Table S6.** Calculated HOMO and LUMO levels of the donor fragments TPA and POZ, and acceptor units BZ and BF at the PBE0/6-31G (d, p) level.

|     | Structure | HOMO | LUMO |
|-----|-----------|------|------|
| TPA |           |      |      |
| POZ |           |      |      |
| BZ  |           |      |      |
| BF  |           |      |      |

**Table S7.** Calculated absorption wavelengths ( $\lambda$ ) and energies ( $\Delta E$ ), oscillator strengths ( $f$ ), and dominant orbital excitations from TD-DFT calculation for the molecules.

| Mol.           | State          | $\lambda$ (nm) | $\Delta E$ (eV) | $f$    | Excitation                   |
|----------------|----------------|----------------|-----------------|--------|------------------------------|
| <b>TPA-BZP</b> | S <sub>1</sub> | 433            | 2.87            | 0.4849 | H → L (93%)                  |
|                | S <sub>2</sub> | 332            | 3.73            | 0.0440 | H-1 → L (91%)                |
|                | T <sub>1</sub> | 624            | 1.99            | 0      | H → L (46%); H-1 → L (43%)   |
|                | T <sub>2</sub> | 414            | 2.99            | 0      | H → L (30%); H → L+1 (15%)   |
| <b>TPA-BF</b>  | S <sub>1</sub> | 398            | 3.12            | 0.1265 | H → L (62%); H-1 → L (35%)   |
|                | S <sub>2</sub> | 329            | 3.77            | 0.2157 | H → L (26%); H-1 → L (44%)   |
|                | T <sub>1</sub> | 502            | 2.47            | 0      | H → L (33%); H-1 → L (49%)   |
|                | T <sub>2</sub> | 391            | 3.17            | 0      | H → L+1 (40%); H → L+4 (21%) |
| <b>POZ-BZP</b> | S <sub>1</sub> | 587            | 2.11            | 0      | H → L (98%)                  |
|                | S <sub>2</sub> | 338            | 3.67            | 0.2865 | H-2 → L (98%)                |
|                | T <sub>1</sub> | 591            | 2.10            | 0      | H → L (97%)                  |
|                | T <sub>2</sub> | 542            | 2.29            | 0      | H-2 → L (81%)                |
| <b>POZ-BF</b>  | S <sub>1</sub> | 456            | 2.72            | 0.0015 | H → L (97%)                  |
|                | S <sub>2</sub> | 359            | 3.46            | 0.0112 | H-1 → L (91%)                |
|                | T <sub>1</sub> | 471            | 2.63            | 0      | H → L (44%); H-1 → L (43%)   |
|                | T <sub>2</sub> | 451            | 2.75            | 0      | H → L (50%); H-1 → L (33%)   |

**Table S8.** Calculated the related orbital distributions and vertical excitation energies of LE states.

|            | Hole                                                                                | Particle                                                                            | $E_{1LE}$ | $E_{3LE}$ |
|------------|-------------------------------------------------------------------------------------|-------------------------------------------------------------------------------------|-----------|-----------|
| <b>BF</b>  | 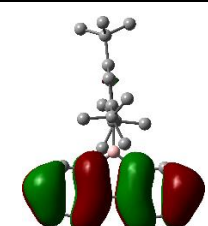 |  | 3.41 eV   | 2.65 eV   |
| <b>BZP</b> |  |  | 3.43 eV   | 2.28 eV   |

**Table S9.** Calculated vertical excitation energies of singlet and triplet states, energy gaps between  $S_1$  and related  $T_n$  states of the investigated molecules by BMK/6-31G (d, p) level (energy unit in eV).

| Mol.                 | TPA-BZP (BZP)            | TPA-BF (BF)              | POZ-BZP  | POZ-BF  |
|----------------------|--------------------------|--------------------------|----------|---------|
| $E_{T_1}$            | 1.99 (2.28) <sup>a</sup> | 2.47 (2.66) <sup>a</sup> | 2.10     | 2.63    |
| $E_{T_2}$            | 2.99 (3.46) <sup>a</sup> | 3.17 (3.64) <sup>a</sup> | 2.29     | 2.75    |
| $E_{T_3}$            | 3.47                     | 3.46                     | 3.17     | 3.10    |
| $E_{T_4}$            | 3.48                     | 3.51                     | 3.47     | 3.57    |
| $E_{T_5}$            | 3.54                     | 3.65                     | 3.71     | 3.59    |
| $E_{S_1}$            | 2.87                     | 3.12                     | 2.11     | 2.72    |
| $E_{S_2}$            | 3.73                     | 3.77                     | 3.67     | 3.47    |
| $\Delta E_{T_2-T_1}$ | 1.00 (1.18) <sup>a</sup> | 0.70 (0.98) <sup>a</sup> | 0.19     | 0.12    |
| $\Delta E_{S_1-T_1}$ | 0.88                     | 0.65                     | 0.01     | 0.09    |
| $\Delta E_{S_1-T_2}$ | -0.12                    | -0.05                    | -0.18    | -0.03   |
| Mol.                 | CZP-BZP                  | CZP-BF                   | DMAC-BZP | DMAC-BF |
| $E_{T_1}$            | 2.08                     | 2.54                     | 2.26     | 2.65    |
| $E_{T_2}$            | 3.26                     | 3.45                     | 2.34     | 2.95    |
| $E_{T_3}$            | 3.46                     | 3.47                     | 3.47     | 3.49    |
| $E_{T_4}$            | 3.47                     | 3.62                     | --       | --      |
| $E_{T_5}$            | 3.64                     | 3.65                     | --       | --      |
| $E_{S_1}$            | 3.15                     | 3.26                     | 2.36     | 2.97    |
| $E_{S_2}$            | 3.67                     | 3.75                     | 3.66     | 3.43    |
| $\Delta E_{T_2-T_1}$ | 1.18                     | 0.91                     | 0.08     | 0.30    |
| $\Delta E_{S_1-T_1}$ | 1.07                     | 0.72                     | 0.10     | 0.32    |
| $\Delta E_{S_1-T_2}$ | -0.11                    | -0.19                    | 0.02     | 0.02    |

<sup>a</sup>: Data in parentheses are parameters from acceptor units.

**Table S10.** Calculated adiabatic excitation energies of  $S_1$  and  $T_1$  states and their energy gaps at BMK/6-31G (d, p) level (energy unit in eV).

| Mol.            | TPA-BZP | TPA-BF | POZ-BZP  | POZ-BF  |
|-----------------|---------|--------|----------|---------|
| $E_{T_1-S_0}$   | 1.80    | 1.93   | 1.77     | 1.92    |
| $E_{S_1-S_0}$   | 2.62    | 2.62   | 1.77     | 2.28    |
| $\Delta E_{ST}$ | 0.82    | 0.69   | 0        | 0.36    |
| Mol.            | CZP-BZP | CZP-BF | DMAC-BZP | DMAC-BF |
| $E_{T_1-S_0}$   | 2.82    | 2.74   | 2.12     | 2.21    |
| $E_{S_1-S_0}$   | 1.90    | 2.21   | 1.93     | 2.57    |
| $\Delta E_{ST}$ | 0.92    | 0.53   | 0.19     | 0.36    |



**Table S11.** Calculated  $\Delta E_{T_2-T_1}$  and NAC constants between  $T_1$  and  $T_2$  states for the investigated molecules by ORCA package.

| Mol.                      | POZ-BZP | POZ-BF | DMAC-BZP | DMAC-BF |
|---------------------------|---------|--------|----------|---------|
| $\Delta E_{T_2-T_1}$      | 0.19    | 0.12   | 0.08     | 0.30    |
| NAC (bohr <sup>-1</sup> ) | 3.43    | 2.11   | 3.30     | 2.68    |
| Mol.                      | TPA-BZP | TPA-BF | CZP-BZP  | CZP-BF  |
| $\Delta E_{T_2-T_1}$      | 1.00    | 0.70   | 1.18     | 0.91    |
| NAC (bohr <sup>-1</sup> ) | 0.98    | 2.27   | 1.85     | 1.06    |

**Table S12.** Calculated parameters for the state hybridization of LE and CT states for the investigated molecules (energy unit in eV).

| Mol.            | $E_{1LE}$ | $E_{1CT}$ | $\Delta E$ | $E_{S_1}$ | $E_{S_2}$ | $\delta E$ | $J_s$   | $\eta_s$ |
|-----------------|-----------|-----------|------------|-----------|-----------|------------|---------|----------|
| <b>CZP-BZP</b>  | 3.43      | 3.39      | 0.02       | 3.15      | 3.67      | 0.52       | 0.26    | 6.50     |
| <b>CZP-BF</b>   | 3.41      | 3.60      | 0.10       | 3.26      | 3.75      | 0.49       | 0.22    | 1.10     |
| <b>DMAC-BZP</b> | 3.43      | 2.59      | 0.42       | 2.36      | 3.66      | 1.30       | 0.50    | 0.60     |
| <b>DMAC-BF</b>  | 3.41      | 2.99      | 0.21       | 2.97      | 3.43      | 0.46       | 0.10    | 0.24     |
| Mol.            | $E_{3LE}$ | $E_{3CT}$ | $\Delta E$ | $E_{T_1}$ | $E_{T_2}$ | $\delta E$ | $J_T$   | $\eta_T$ |
| <b>CZP-BZP</b>  | 2.28      | 3.06      | 0.39       | 2.08      | 3.26      | 1.18       | 0.44    | 0.57     |
| <b>CZP-BF</b>   | 2.65      | 3.34      | 0.34       | 2.54      | 3.45      | 0.91       | 0.30    | 0.44     |
| <b>DMAC-BZP</b> | 2.28      | 2.32      | 0.02       | 2.26      | 2.34      | 0.08       | 0.04    | 1.00     |
| <b>DMAC-BF</b>  | 2.65(5)   | 2.94(3)   | 0.14(4)    | 2.65(3)   | 2.94(4)   | 0.29(1)    | 0.02(0) | 0.06(9)  |

**Table S13.** Calculated dihedral angles (in degree) for the investigated molecules in the ground and excited states.

| Mol.            | $S_0$ | $S_1$ | $T_1$ | $ S_0-S_1 $ | $ S_0-T_1 $ |
|-----------------|-------|-------|-------|-------------|-------------|
| <b>CZP-BZP</b>  | 36.4  | 14.1  | 14.6  | 22.3        | 21.8        |
| <b>CZP-BF</b>   | 37.5  | 29.2  | 27.7  | 8.3         | 9.8         |
| <b>DMAC-BZP</b> | 86.0  | 89.9  | 61.0  | 3.9         | 25.0        |
| <b>DMAC-BF</b>  | 89.5  | 85.5  | 59.8  | 4.0         | 29.2        |

**Table S14.** Calculated parameters for the state hybridization of LE and CT states for the investigated D-A-D type molecules (energy unit in eV).

| <b>Mol.</b>       | $E_{1LE}$ | $E_{1CT}$ | $\Delta E$ | $E_{S_1}$ | $E_{S_3}$             | $\delta E$ | $J_S$ | $\eta_S$ |
|-------------------|-----------|-----------|------------|-----------|-----------------------|------------|-------|----------|
| <i>o</i> -2CZP-BZ | 3.43      | 3.71      | 0.14       | 3.20      | 3.94                  | 0.74       | 0.34  | 1.22     |
| <i>m</i> -2CZP-BZ | 3.43      | 3.60      | 0.08       | 3.23      | 3.80                  | 0.57       | 0.27  | 1.69     |
| <i>p</i> -2CZP-BZ | 3.43      | 3.36      | 0.04       | 3.00      | 3.79                  | 0.79       | 0.39  | 4.87     |
| <i>o</i> -2POZ-BZ | 3.43      | 2.40      | 0.52       | 2.07      | 3.76                  | 1.69       | 0.67  | 0.64     |
| <i>m</i> -2POZ-BZ | 3.43      | 2.40      | 0.52       | 2.07      | 3.82                  | 1.75       | 0.71  | 0.68     |
| <i>p</i> -2POZ-BZ | 3.43      | 2.36      | 0.54       | 2.01      | 3.78                  | 1.77       | 0.70  | 0.65     |
| <b>Mol.</b>       | $E_{3LE}$ | $E_{3CT}$ | $\Delta E$ | $E_{T_1}$ | $E_{T_n}$             | $\delta E$ | $J_T$ | $\eta_T$ |
| <i>o</i> -2CZP-BZ | 2.28      | 3.15      | 0.43       | 2.26      | 3.17(T <sub>2</sub> ) | 0.91       | 0.13  | 0.15     |
| <i>m</i> -2CZP-BZ | 2.28      | 2.96      | 0.34       | 2.18      | 3.06(T <sub>2</sub> ) | 0.88       | 0.28  | 0.41     |
| <i>p</i> -2CZP-BZ | 2.28      | 2.93      | 0.32       | 2.05      | 3.16(T <sub>2</sub> ) | 1.11       | 0.45  | 0.69     |
| <i>o</i> -2POZ-BZ | 2.28      | 2.27      | 0.01       | 1.86      | 2.69(T <sub>3</sub> ) | 0.83       | 0.41  | 20.5     |
| <i>m</i> -2POZ-BZ | 2.28      | 2.42      | 0.07       | 2.05      | 2.65(T <sub>3</sub> ) | 0.60       | 0.29  | 2.08     |
| <i>p</i> -2POZ-BZ | 2.28      | 2.21      | 0.03       | 2.00      | 2.49(T <sub>3</sub> ) | 0.49       | 0.24  | 3.46     |

**Table S15.** Calculated vertical excitation energies of singlet and triplet states, energy gaps, SOC constants ( $\text{cm}^{-1}$ ), NAC constants ( $\text{bohr}^{-1}$ ),  $k_{\text{RISC}}$  ( $\text{s}^{-1}$ ) between  $S_1$  and related  $T_n$  states, overlap integral  $\beta$ ,  $k_p$  ( $\text{s}^{-1}$ ) and  $k_f$  ( $\text{s}^{-1}$ ) of the investigated molecules by BMK/6-31G (d, p) level (energy unit in eV).

| Mol.                       | <i>o</i> -2CZP-BZ                    | <i>m</i> -2CZP-BZ                    | <i>p</i> -2CZP-BZ                    |
|----------------------------|--------------------------------------|--------------------------------------|--------------------------------------|
| $E_{T_1}$                  | 2.26                                 | 2.18                                 | 2.05                                 |
| $E_{T_2}$                  | 3.17                                 | 3.06                                 | 3.16                                 |
| $E_{T_3}$                  | 3.27                                 | 3.30                                 | 3.26                                 |
| $E_{S_1}$                  | 3.20                                 | 3.23                                 | 3.00                                 |
| $E_{S_2}$                  | 3.38                                 | 3.42                                 | 3.34                                 |
| $\Delta E_{T_2-T_1}$       | 0.91                                 | 0.88                                 | 1.11                                 |
| NAC ( $T_2-T_1$ )          | 1.68                                 | 2.12                                 | 1.78                                 |
| $\Delta E_{S_1-T_1}$       | 0.94                                 | 1.05                                 | 0.95                                 |
| $\Delta E_{S_1-T_2}$       | 0.03                                 | 0.17                                 | -0.16                                |
| SOC ( $T_1-S_1$ )          | 0.27                                 | 0.46                                 | 0.18                                 |
| SOC ( $T_2-S_1$ )          | 0.43                                 | 0.56                                 | 0.34                                 |
| $k_{\text{RISC}}(T_1-S_1)$ | $1.11 \times 10^{-38}$               | $2.10 \times 10^{-48}$               | $6.44 \times 10^{-40}$               |
| $k_{\text{RISC}}(T_2-S_1)$ | $2.91 \times 10^7$                   | $2.12 \times 10^5$                   | $6.65 \times 10^7$                   |
| $f_{\text{em}}$            | 0.2438                               | 0.3287                               | 0.8057                               |
| $\Delta E_{\text{em}}$     | 2.51                                 | 2.71                                 | 2.36                                 |
| $\beta(S_1)$               | 0.5022                               | 0.4472                               | 0.5830                               |
| $k_f$                      | $0.67 \times 10^8$                   | $1.05 \times 10^8$                   | $1.95 \times 10^8$                   |
| $k_p$                      | $2.06 \times 10^{-2}$                | $3.11 \times 10^{-2}$                | $6.43 \times 10^{-3}$                |
| Mol.                       | <i>o</i> -2POZ-BZ                    | <i>m</i> -2POZ-BZ                    | <i>p</i> -2POZ-BZ                    |
| $E_{T_1}$                  | 1.86                                 | 2.05                                 | 2.00                                 |
| $E_{T_2}$                  | 2.13                                 | 2.14                                 | 2.05                                 |
| $E_{T_3}$                  | 2.69                                 | 2.65                                 | 2.49                                 |
| $E_{S_1}$                  | 2.07                                 | 2.07                                 | 2.01                                 |
| $E_{S_2}$                  | 2.32                                 | 2.40                                 | 2.06                                 |
| $\Delta E_{T_2-T_1}$       | 0.27                                 | 0.09                                 | 0.05                                 |
| NAC ( $T_2-T_1$ )          | 5.03                                 | 6.32                                 | 3.74                                 |
| $\Delta E_{S_1-T_1}$       | 0.21                                 | 0.02                                 | 0.01                                 |
| $\Delta E_{S_1-T_2}$       | -0.06                                | -0.07                                | -0.04                                |
| SOC ( $T_1-S_1$ )          | 0.53                                 | 0.67                                 | 0.09                                 |
| SOC ( $T_2-S_1$ )          | 0.47                                 | 1.14                                 | 0.21                                 |
| $k_{\text{RISC}}(T_1-S_1)$ | $1.98 \times 10^4$                   | $9.03 \times 10^7$                   | $2.04 \times 10^6$                   |
| $k_{\text{RISC}}(T_2-S_1)$ | $1.54 \times 10^8$                   | $9.72 \times 10^8$                   | $2.54 \times 10^7$                   |
| $f_{\text{em}}$            | 0(0.0029) <sup>a</sup>               | 0(0.0031) <sup>a</sup>               | 0(0.0037) <sup>a</sup>               |
| $\Delta E_{\text{em}}$     | 1.22(1.24) <sup>a</sup>              | 1.33(1.34) <sup>a</sup>              | 1.35(1.36) <sup>a</sup>              |
| $\beta(S_1)$               | 0.1191(0.1584) <sup>a</sup>          | 0.1199(0.1504) <sup>a</sup>          | 0.1145(0.1468) <sup>a</sup>          |
| $k_f$                      | 0( $1.94 \times 10^5$ ) <sup>a</sup> | 0( $2.41 \times 10^5$ ) <sup>a</sup> | 0( $2.97 \times 10^5$ ) <sup>a</sup> |
| $k_p$                      | $2.99 \times 10^{-2}$                | $7.05 \times 10^{-2}$                | $2.08 \times 10^{-3}$                |

<sup>a</sup>: Data in parentheses are parameters from the molecular geometries with the specific dihedral angle  $\alpha = 80^\circ$ .

**Figure S1.** The TDM maps, the overlaps and distributions of electron-hole wavefunctions for the **BF**-based molecules.

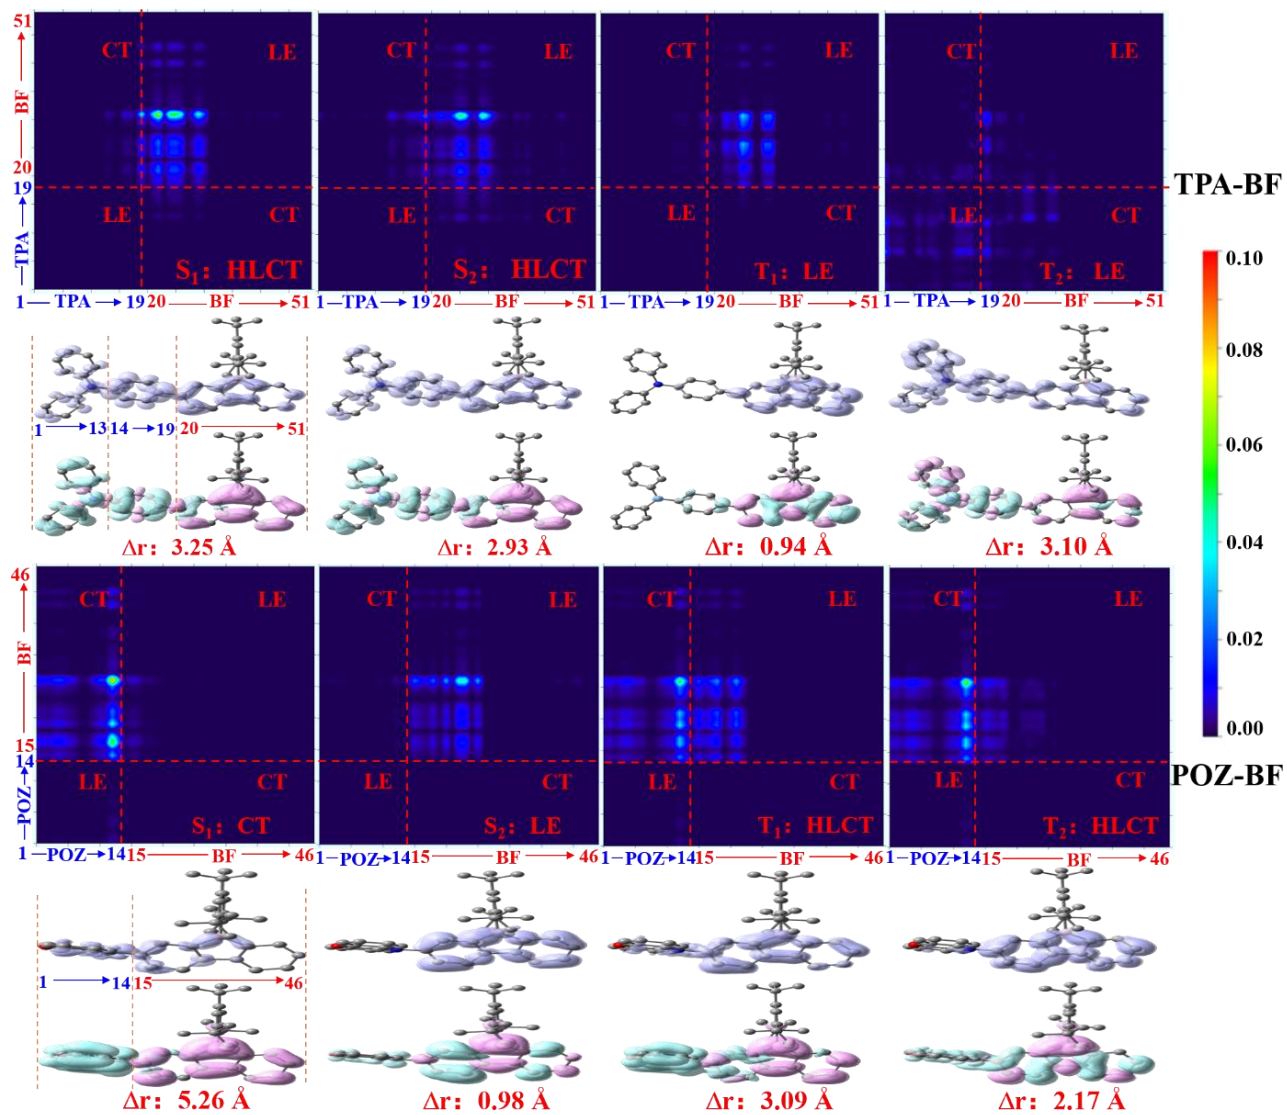

**Figure S2.** NTO analysis for the  $S_1$ ,  $S_2$ ,  $T_1$ , and  $T_2$  states and related energy diagrams of the state hybridization between LE and CT states for both singlet and triplet subspaces.

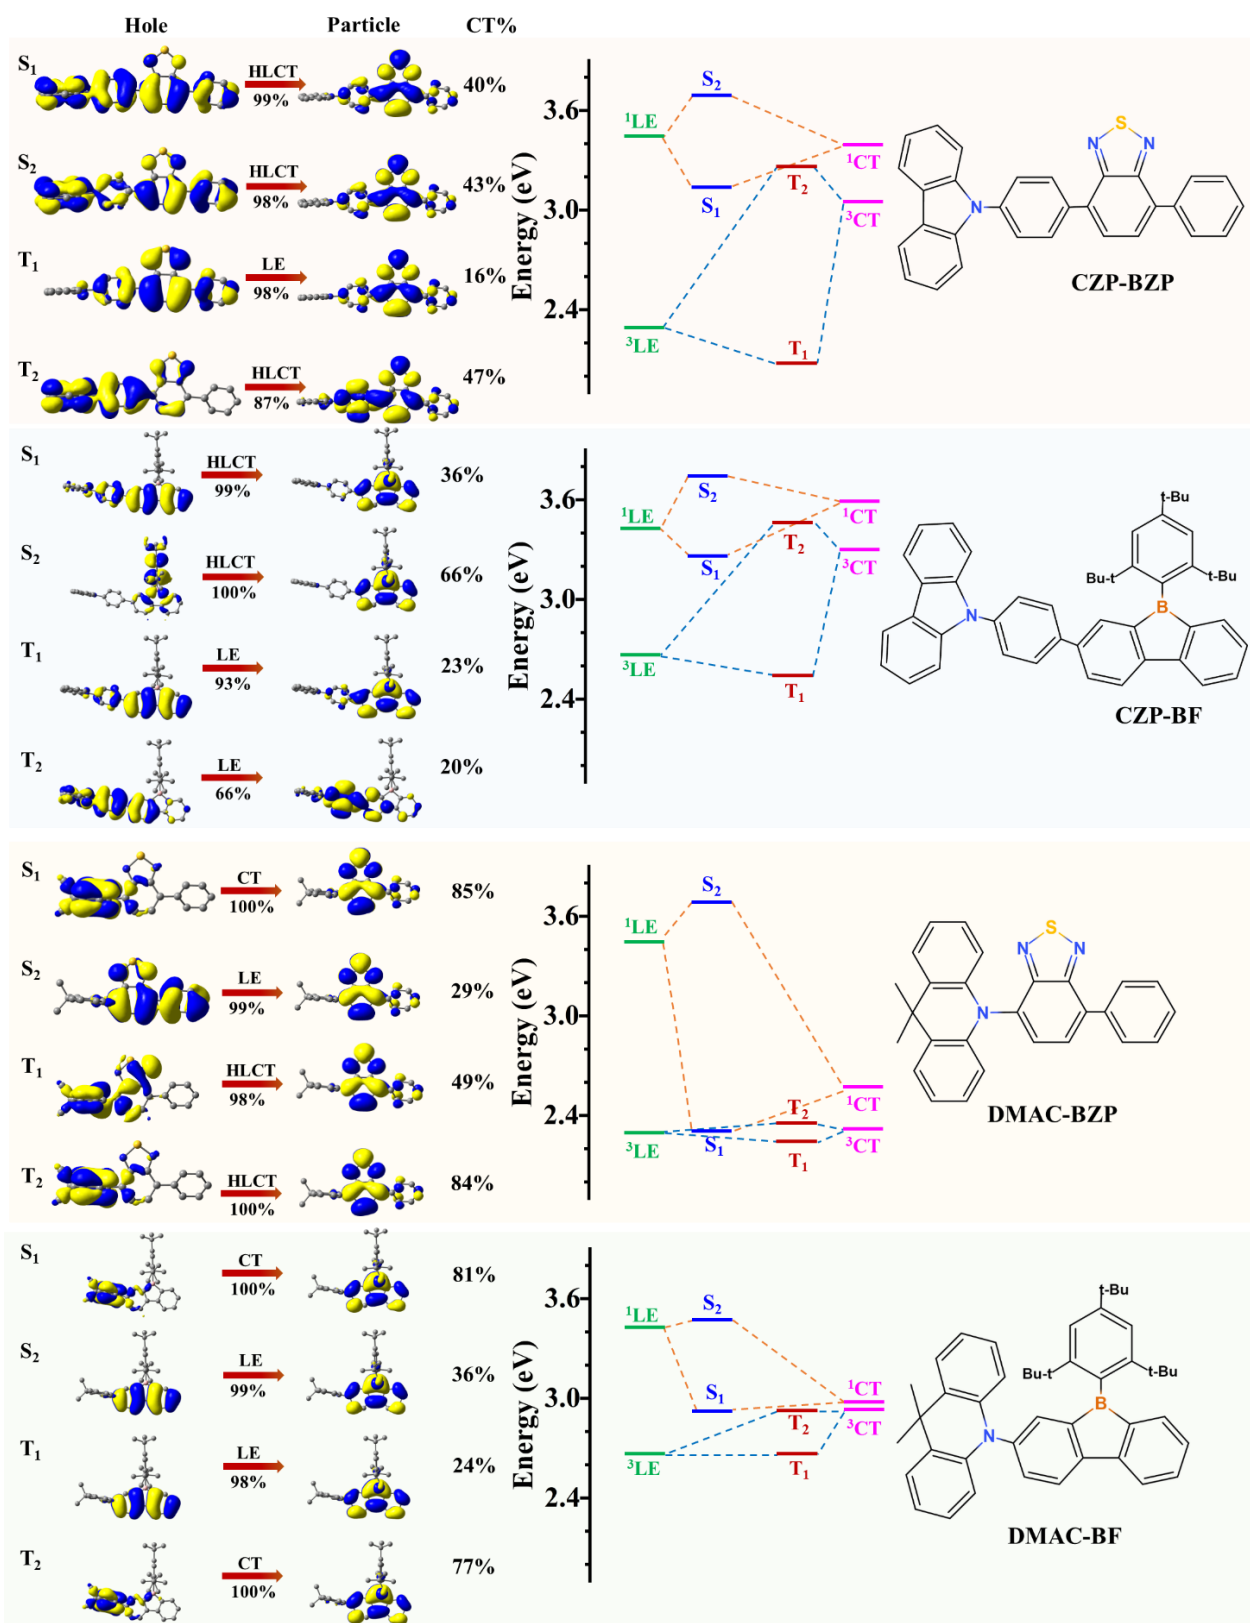

**Figure S3.** Calculated emission energies and oscillator strengths in  $S_1$  states of the POZ-based molecules as function of the twisted angles. The blue dashed lines label the thermally activated energy at room temperature. The inserted structures are the optimized compounds with the lowest energies.

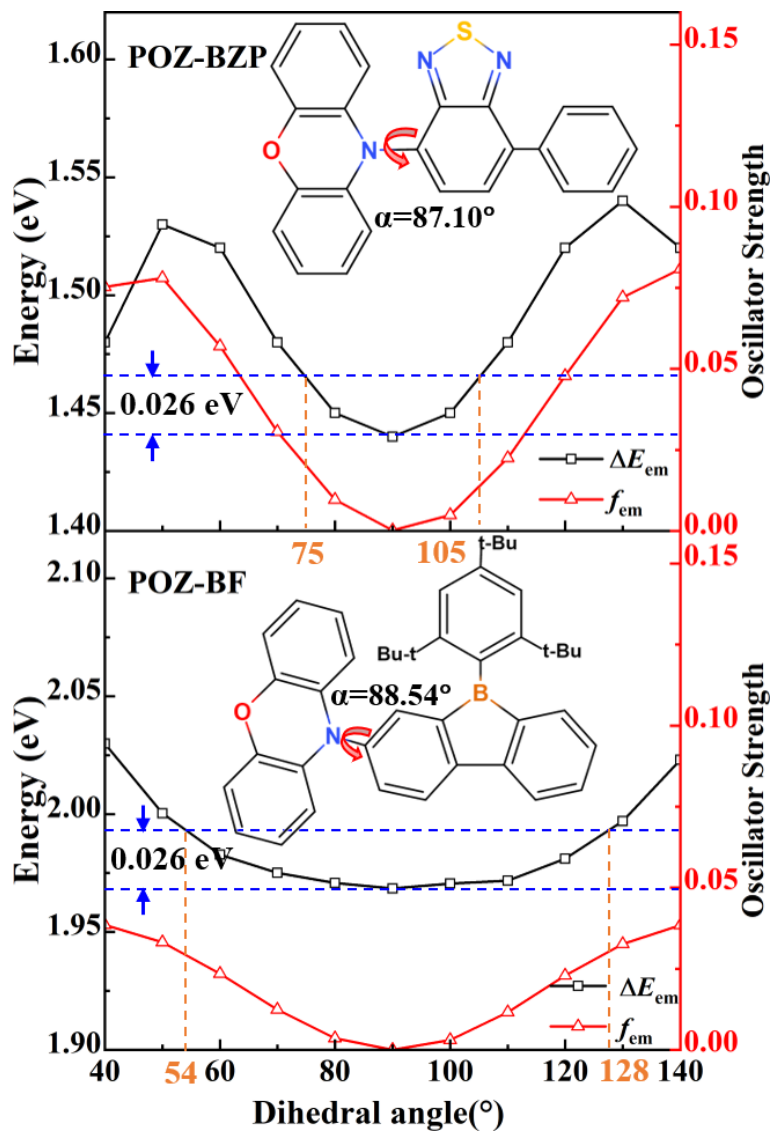

**Figure S4.** Chemical structures of the investigated D-A-D type molecules.

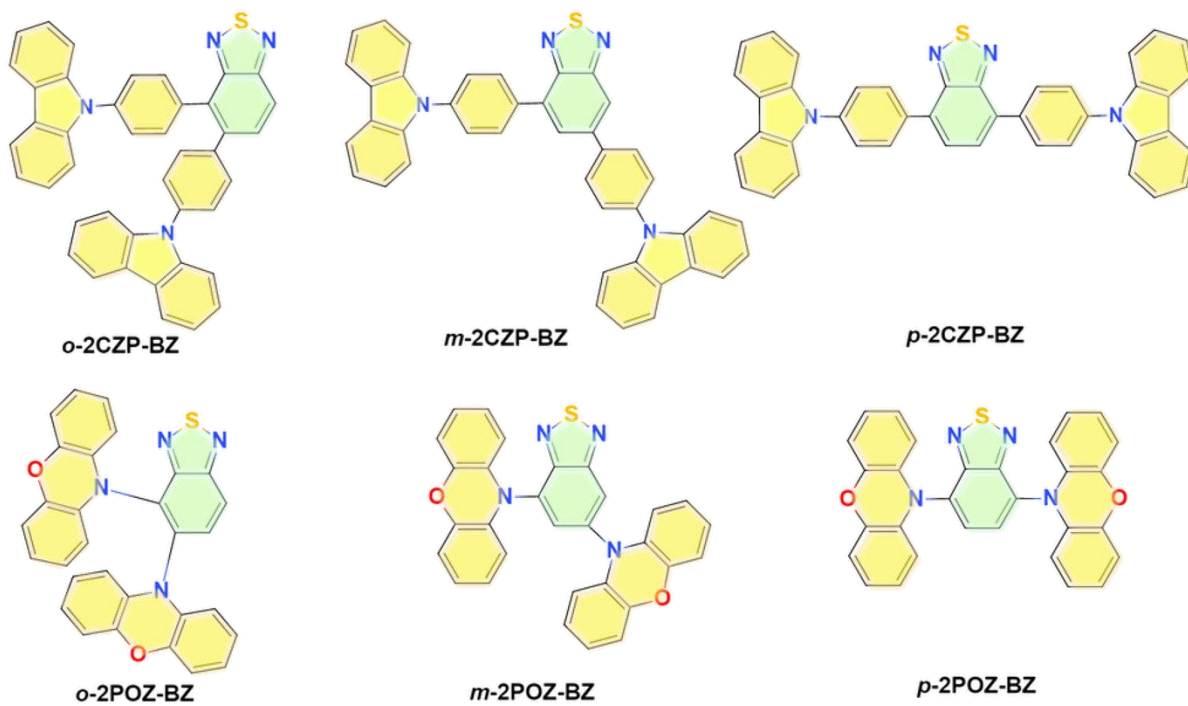

**Figure S5.** NTO analysis for the related excited states and energy diagrams of the state hybridization between LE and CT states of both singlet and triplet subspaces for D-A-D type HLCT molecules.

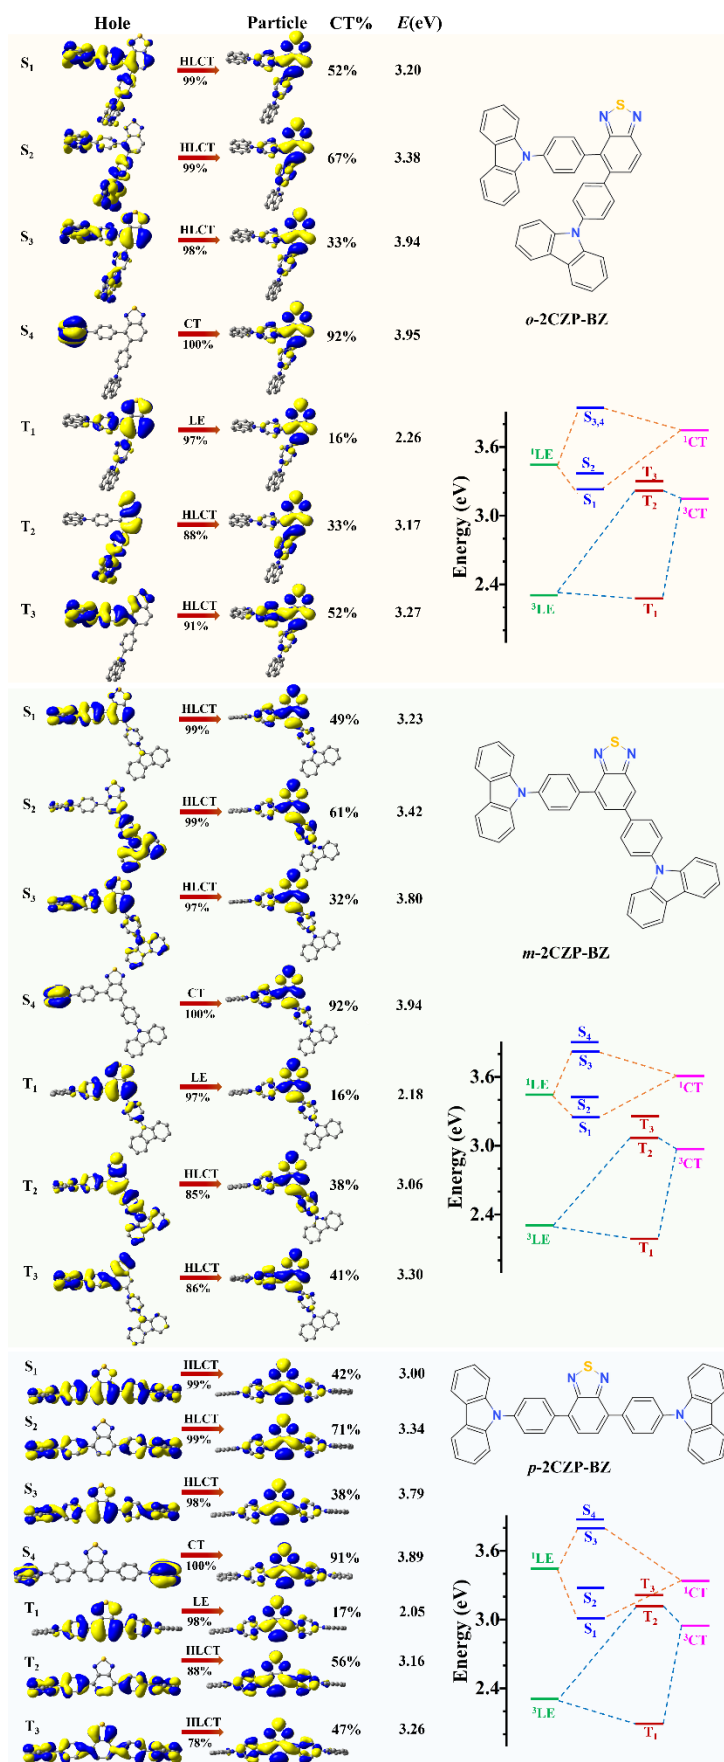



**Figure S6.** NTO analysis for the related excited states and energy diagrams of the state hybridization between LE and CT states of both singlet and triplet subspaces for D-A-D type TADF molecules.

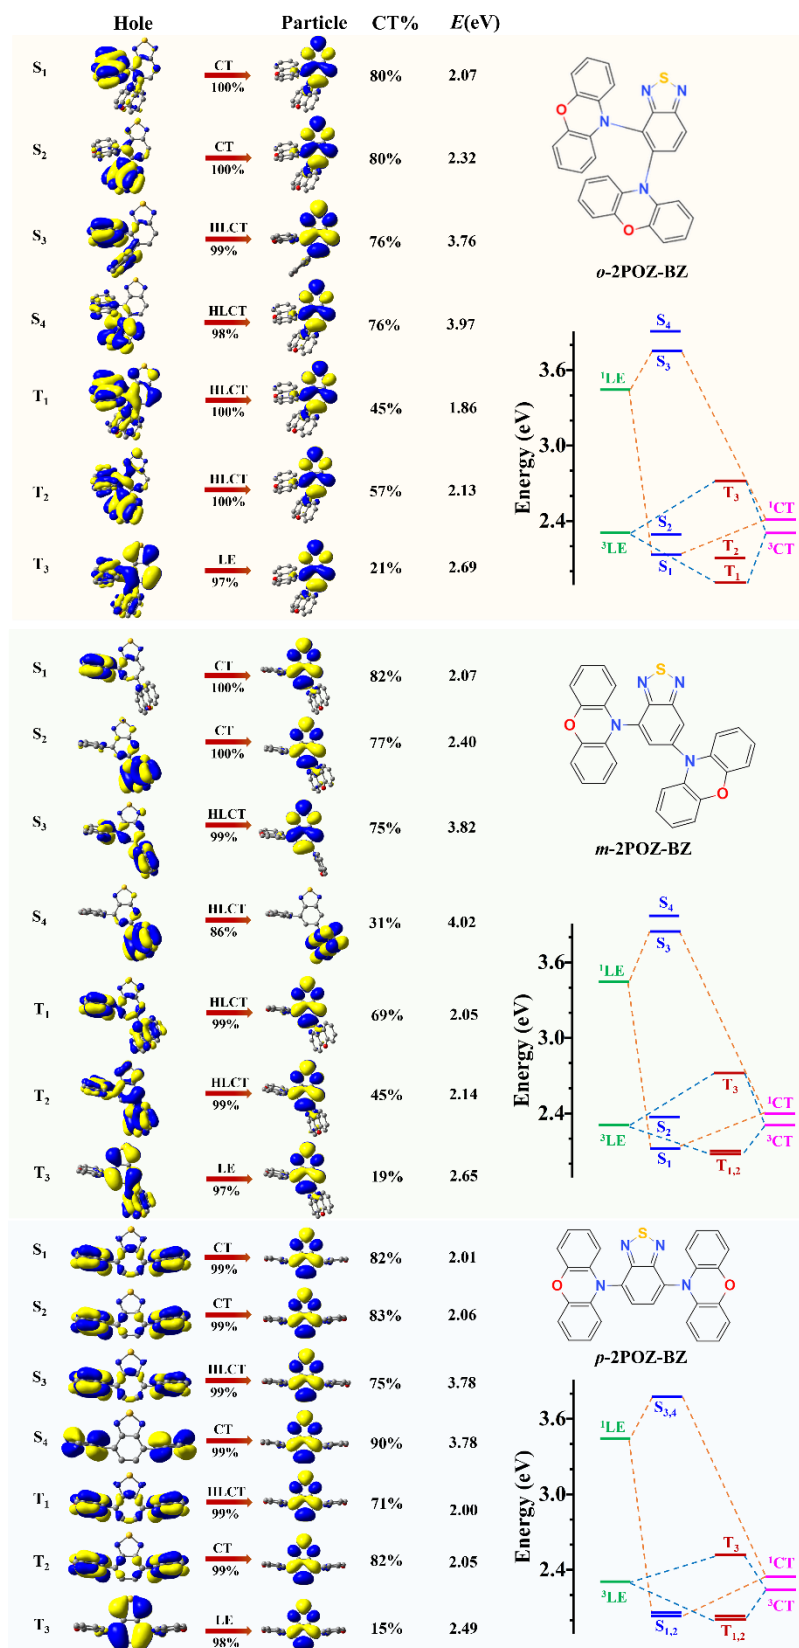

Supplement: d2tc02896d1.pdf [file d2tc02896d1.pdf]
